# Supplementary material
Source: PubMed Central journal article supplement (PMC6898790)
Supplement: NIHMS1542764-supplement-5.pdf [file NIHMS1542764-supplement-5.pdf]

Supplementary Table 2. TaqMan® Real-time PCR assays for mouse terminal ileum cDNA

---

|                |               |              |               |
|----------------|---------------|--------------|---------------|
| <i>β-Actin</i> | Mm00607939-m1 | <i>Duox2</i> | Mm01326247-m1 |
| <i>Hmox1</i>   | Mn00516005-m1 | <i>I1b</i>   | Mm00434228-m1 |
| <i>Il4</i>     | Mm00445259-m1 | <i>Il13</i>  | Mm00434204-m1 |
| <i>Nox1</i>    | Mm00549170-m1 | <i>Nox2</i>  | Mm01287743-m1 |
| <i>Nox4</i>    | Mm00479246-m1 | <i>Tnf</i>   | Mm00443258-m1 |

---
