# Supplementary material
Source: PubMed Central journal article supplement (PMC6898790)

Supplementary Fig. 1

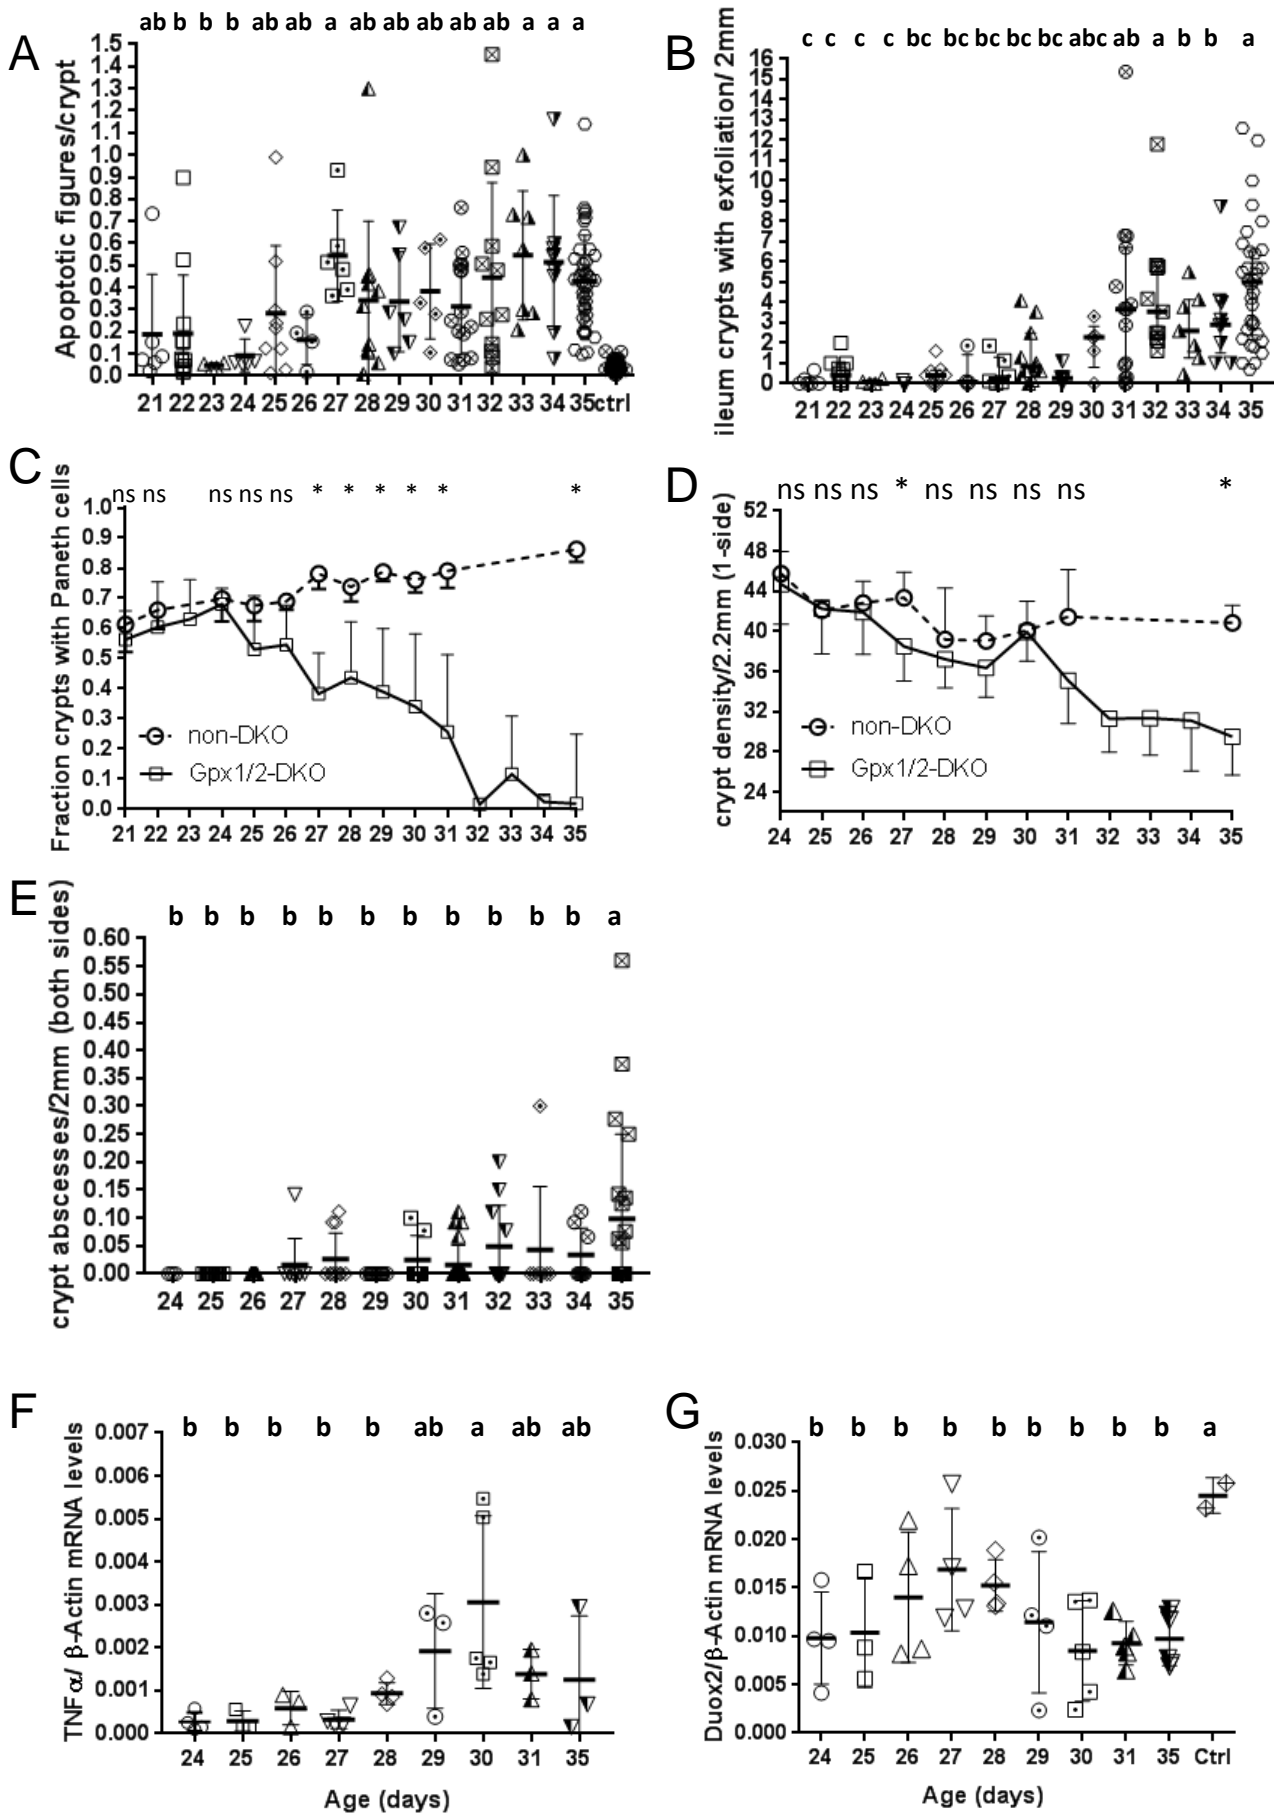

Supplement: NIHMS1542764-supplement-4.pdf [file NIHMS1542764-supplement-4.pdf]
